# Supplementary material
Source: PubMed Central journal article supplement (PMC8118810)
Supplement: A0993.pdf [file A0993.pdf]

**On-line Table: rCBVmax for low-grade and high-grade gliomas reported in previous DSC-MR perfusion studies**

| Author (reference)             | No. of Patients | LGG Mean rCBVmax (range) | HGG Mean rCBVmax (range) | Histology               | Technique |
|--------------------------------|-----------------|--------------------------|--------------------------|-------------------------|-----------|
| Law et al. <sup>2</sup>        | 160             | 2.14 (0.77–9.84)         | 5.18 (0.96–9.80)         | Histology not specified | GE-EPI    |
| Law et al. <sup>3</sup>        | 35              | 2.41 (0.37–5.96)         |                          | AC, OA, OD              | GE-EPI    |
| Sugahara et al. <sup>6</sup>   | 25              | 1.21 (0.43–1.34)         | 4.86 (0.61–9.71)         | AC, OD, GBM*            | GE-EPI    |
|                                |                 | 1.22 (0.54–2.31)         | 2.90 (0.56–9.30)         |                         | SE-EPI    |
| Hakyemez et al. <sup>10</sup>  | 33              | 3.32 (1.40–8.68)         | 6.50 (2.39–18.60)        | AC, OA, OD, GBM         | GE-EPI    |
| Yang et al. <sup>9</sup>       | 17              | 1.74 (1.17–2.45)         | 6.10 (1.70–16.17)        | AC, OA, OD, GBM         | SE-EPI    |
| Cha et al. <sup>4</sup>        | 25              | 0.92 (0.48–1.34) AC      |                          | AC and OD               | GE-EPI    |
|                                |                 | 3.68 (1.29–9.24) OD      |                          |                         | GE-EPI    |
| Spampinato et al. <sup>8</sup> | 22              | 1.61                     | 5.45                     | OD and OA               | GE-EPI    |

**Note:**—LGG indicates low-grade glioma; HGG, high-grade glioma; AC, astrocytoma; OA, oligoastrocytoma; OD, oligodendroglioma; GBM, glioblastoma multiforme; GE, gradient-echo; EPI, echo-planar imaging; SE, spin-echo; rCBV max, maximum relative cerebral blood volume; DSC, dynamic susceptibility contrast enhanced.

\* All of the low grades were astrocytomas.
